# Supplementary material
Source: PubMed Central journal article supplement (PMC1809984)
Supplement: 15101418supp.pdf [file 15101418supp.pdf]

This is an electronic appendix to the Biology Letter by Zafiropoulos *et al.* 2004 Analysis of 'driver' and 'passenger' CD8<sup>+</sup> T-cell responses against variable viruses. *Proc. R. Soc. Lond. B (Suppl.)* **271**, S53–S56. (DOI 10.1098/rsbl.2003.0088.)

Electronic appendices are refereed with the text. However, no attempt has been made to impose a uniform editorial style on the electronic appendices.

### **Electronic Appendix A**

**Table 1:** “Selected” and “nonselected” epitopes from HIV RT studied in the paper of Moore *et al* (2002). For each the binding score represents the estimated half-life of dissociation. Selection += positively selected 0=not selected -= evidence of negative selection (i.e conservation).

**Table 2:** *Nonprotective passenger responses from the paper of Altfeld et al (2002).* Analysis as of predicted binding and variability.

*Further tables: Estimated binding and variability for HIV derived peptides.*

**Table 3:** Epitopes restricted by HLA-A alleles. All epitopes derived from the best defined epitope list from HIV molecular immunology database 2001. **Table 4:** Equivalent data for HLA B and a single C allele. Estimated “off-rate” is described as “Bimas affinity”. **Table 5:** Restricted epitopes with limited variability. Those marked in bold represent those with the slowest estimated binding off rates (>40 hrs)

In all cases estimated BIMAS affinity is the predicted half life of decay expressed in hours. % variability at a locus is the % of strains differing from the consensus sequence. This can be applied to the residue or the epitope across strains described in the Clade B database (see methods/Fig 2).

**Table 1**

| HLA   | Sequence     | Length | Residues   | Bimas affinity | Variability Anchor 1 | Variability Anchor 2 | Percentage Strains Different | Percentage residues different | Selected? |
|-------|--------------|--------|------------|----------------|----------------------|----------------------|------------------------------|-------------------------------|-----------|
| A0301 | GIPHPAGLK    | 9      | RT 93-101  | 2.7            | 0                    | 0                    | 7.7                          | 0.8                           | +         |
| B3501 | TVLDVGDY     | 9      | RT 107-115 | 4              | 7.7                  | 0                    | 7.7                          | 0.9                           | 0         |
| A0201 | VLDVGDYFSV   | 11     | RT 108-118 | ?              | 0                    | 0                    | 7.7                          | 0.7                           | 0         |
| A9    | DAYFSVPL     | 8      | RT113-120  | ?              | 0                    | 0                    | 0                            | 0                             | +         |
| B5101 | DAYFSVPL     | 8      | RT113-120  | ?              | 0                    | 0                    | 0                            | 0                             | 0         |
| B3501 | VPLDKDFRKY   | 10     | RT 118-127 | 120            | 0                    | 0                    | 31                           | 4                             | +         |
| A0201 | YTAFTIPSI    | 9      | RT 127-135 | 1.53           | 0                    | 31                   | 31                           | 3.4                           | 0         |
| B5101 | TAFTIPSI     | 8      | RT 128-135 | ?              | 0                    | 31                   | 31                           | 3.8                           | +         |
| B5101 | QGWKGSPI     | 9      | RT 151-159 | 194            | 0                    | 0                    | 0                            | 0                             | 0         |
| B7    | SPAIFQSSM    | 9      | RT 156-164 | 20             | 0                    | 0                    | 15                           | 1.7                           | +         |
| B3501 | SPAIFQSSM    | 9      | RT 156-164 | 40             | 0                    | 0                    | 15                           | 1.7                           | 0         |
| B7    | SPAIFQSSMT   | 10     | RT 156-165 | 2              | 0                    | 0                    | 15                           | 1.5                           | +         |
| A0301 | AIFQSSMTK    | 9      | RT 158-166 | 20             | 0                    | 15                   | 31                           | 3                             | 0         |
| A11   | AIFQSSMTK    | 9      | RT 158-166 | 1.2            | 0                    | 15                   | 31                           | 3                             | +         |
| A7401 | AIFQSSMTK    | 9      | RT 158-166 | 1.2            | 0                    | 15                   | 31                           | 3                             | 0         |
| A28   | AIFQSSMTK    | 9      | RT 158-166 | 1.2            | 0                    | 15                   | 31                           | 3                             | 0         |
| A7401 | KQNPDIYIY    | 9      | RT 173-181 | ?              | 0                    | 0                    | 31                           | 3.4                           | +         |
| B3501 | NPDIYIYQY    | 9      | RT 175-183 | 12             | 0                    | 0                    | 23                           | 2.6                           | +         |
| A0201 | VIYQYMDL     | 9      | RT179-187  | 18             | 0                    | 0                    | 15                           | 0.02                          | 0         |
| A0201 | YQYMDL       | 9      | RT 181-89  | 570            | 0                    | 0                    | 0                            | 0                             | 0         |
| A3    | DLEIGQHRTK   | 10     | RT 192-201 | 0.6            | 0                    | 0                    | 54                           | 6.2                           | 0         |
| A2    | KIEELRQHL    | 9      | RT 201-209 | 2.7            | 7.7                  | 0                    | 23                           | 2.6                           | 0         |
| B40   | IEELRQHLL    | 9      | RT 202-210 | 10             | 0                    | 0                    | 23                           | 2.6                           | +         |
| B44   | EELRQHLLRW   | 10     | RT 203-210 | 36             | 0                    | 0                    | 31                           | 3.1                           | +         |
| A2    | LLRWGLTTPDKK | 12     | RT 209-220 | ?              | 0                    | 0                    | 38                           | 3.2                           | -         |

**Table 2**

**Atfeld et al: Strong responses which do not protect**

| HLA allele | Peptide Sequence | Mer | Protein Region | BIMAS<br>Estimated<br>Binding Affinity | Variability<br>Anchor 1 | Variability<br>Anchor 2 | Percentage B<br>Clade Strains<br>Different | Percentage<br>Residues<br>Mutated<br>Amongst B<br>Clade strains |
|------------|------------------|-----|----------------|----------------------------------------|-------------------------|-------------------------|--------------------------------------------|-----------------------------------------------------------------|
| A0301      | GIPHPAGLK        | 9   | RT 93-101      | 2.7                                    | 0                       | 0                       | 7.7                                        | 0.8                                                             |
| A3         | KLVDFRELNK       | 10  | RT 73-82       | 180                                    | 0                       | 8                       | 8                                          | 0.8                                                             |
| B7         | SPRTLNAWV        | 9   | p24 16-24      | 40                                     | 0                       | 0                       | 4.2                                        | 0.5                                                             |
| B7         | TPQDLNTML        | 9   | p24 48-56      | 80                                     | 3.8                     | 0                       | 4.2                                        | 0.5                                                             |
| B7         | GPGHKARVL        | 9   | p24 223-231    | 80                                     | 0                       | 0                       | 33                                         | 5.5                                                             |
| B7         | SPAIFQSSM        | 9   | RT 156-164     | 20                                     | 0                       | 0                       | 15                                         | 1.7                                                             |
| A0301      | KIRLRPGGK        | 9   | p17 18-26      | 1.8                                    | 4.2                     | 0                       | 12.5                                       | 1.9                                                             |

**Table 3**

| HLA allele | Peptide Sequence | Mer | Protein Region    | BIMAS Estimated Binding Affinity | Variability Anchor 1 | Variability Anchor 2 | Percentage B Clade Strains Different | Percentage Residues Mutated Amongst B Clade strains |
|------------|------------------|-----|-------------------|----------------------------------|----------------------|----------------------|--------------------------------------|-----------------------------------------------------|
| A0201      | KLTPLCVTL        | 9   | gp160 121-129     | 74.77                            | 4.5                  | 0                    | 14                                   | 1.5                                                 |
| A0201      | RGPGRAFVTI       | 10  | gp160 311-320     | 0.13                             | 9.1                  | 12.5                 | 75                                   | 14                                                  |
| A0201      | SLLNATDIAV       | 10  | gp160 813-822     | 257.34                           | 27                   | 0                    | 59                                   | 10                                                  |
| A0201      | PLTFGWCYKL       | 10  | Nef 136-145       | 0.47                             | 3.8                  | 0                    | 12                                   | 1.5                                                 |
| A0201      | LTFGWCFKLV       | 10  | Nef 137-146       | 11.54                            | 7.7                  | 3.8                  | 15                                   | 1.9                                                 |
| A0201      | VLEWRFD SRL      | 10  | Nef 180-189       | 8.83                             | 27                   | 0                    | 65                                   | 12.6                                                |
| A0201      | FLGKIWPSYK       | 10  | p1 1-10           | 0.38                             | 0                    | 4.2                  | 29                                   | 2.9                                                 |
| A0201      | SLYNTVATL        | 9   | p17 77-85         | 157                              | 4.2                  | 0                    | 58                                   | 9.7                                                 |
| A0201      | VLAEMSQV         | 9   | p24/p2 230-237    | 1115                             | 0                    | 17                   | 21                                   | 4                                                   |
| A0201      | LVGPTPVNI        | 9   | Protease 76-84    | 1.55                             | 8                    | 0                    | 8                                    | 0.9                                                 |
| A0201      | YTAFTIPSI        | 9   | RT 127-135        | 1.53                             | 0                    | 31                   | 31                                   | 3.4                                                 |
| A0201      | ILKEPVHGV        | 9   | RT 309-317        | 39.03                            | 0                    | 0                    | 31                                   | 4.3                                                 |
| A0201      | ALVEICTEM        | 9   | RT 33-41          | 20.4                             | 0                    | 0                    | 23                                   | 4.2                                                 |
| A0201      | VIYQYMDDL        | 9   | RT179-187         | 18                               | 0                    | 0                    | 15                                   | 0.02                                                |
| A0201      | AIIRILQQL        | 9   | Vpr 59-67         | 6.76                             | 24                   | 0                    | 29                                   | 5.2                                                 |
| A0201      | RILQQLFI         | 9   | Vpr 62-70         | 67.14                            | 24                   | 0                    | 24                                   | 2.6                                                 |
| A0205      | SLYNTVATL        | 9   | p17 77-85         | 42                               | 4.2                  | 0                    | 58                                   | 9.7                                                 |
| A0301      | TVYYGVPVWK       | 10  | gp160 37-46       | 15                               | 0                    | 4.5                  | 4.5                                  | 0.5                                                 |
| A0301      | QVPLRPMTYK       | 10  | Nef 73-82         | 4.5                              | 0                    | 11.5                 | 19                                   | 3.4                                                 |
| A0301      | KIRLRPGGK        | 9   | p17 18-26         | 1.8                              | 4.2                  | 0                    | 12.5                                 | 1.9                                                 |
| A0301      | RLRPGGKKK        | 9   | p17 20-29         | 15                               | 0                    | 21                   | 21                                   | 2.8                                                 |
| A0301      | AIFQSSMTK        | 9   | RT 158-166        | 20                               | 0                    | 15                   | 31                                   | 3                                                   |
| A0301      | QIYPGIKVR        | 9   | RT 269-277        | 2.25                             | 0                    | 31                   | 31                                   | 4.3                                                 |
| A0301      | GIPHPAGLK        | 9   | RT 93-101         | 2.7                              | 0                    | 0                    | 7.7                                  | 0.8                                                 |
| A0301      | RIRTWKSLVK       | 10  | Vif 17-26         | 4                                | 14                   | 4.8                  | 48                                   | 5.2                                                 |
| A1101      | SVITQACPK        | 9   | gp160 199-207     | 3                                | 9.1                  | 0                    | 18                                   | 2.5                                                 |
| A1101      | AVFIHNFKRK       | 10  | Integrase 179-188 | 2                                | 0                    | 0                    | 0                                    | 0                                                   |
| A1101      | QVPLRPMTYK       | 10  | Nef 73-82         | 2                                | 0                    | 12                   | 19                                   | 3.4                                                 |
| A1101      | AVDLSHFLK        | 9   | Nef 84-92         | 6                                | 50                   | 19.2                 | 69                                   | 9.4                                                 |
| A1101      | TLYCVHQRI        | 9   | p17 84-92         | 0.008                            | 0                    | 0                    | 75                                   | 9.7                                                 |
| A1101      | QIIEQLIKK        | 9   | RNase 80-88       | 1.2                              | 0                    | 0                    | 23                                   | 2.6                                                 |
| A1101      | AIFQSSMTK        | 9   | RT 158-166        | 1.2                              | 0                    | 15                   | 31                                   | 3                                                   |
| A1101      | IYQEPFKLNK       | 10  | RT 341-350        | 0.4                              | 0                    | 0                    | 38                                   | 4.6                                                 |
| A24        | LFCASDAKAY       | 10  | gp160 52-61       | 0.5                              | 0                    | 9                    | 23                                   | 3                                                   |
| A24        | RYLKDQQLL        | 9   | gp160 585-593     | 720                              | 0                    | 9                    | 64                                   | 8                                                   |
| A24        | KYKCLKHIVW       | 9   | p17 28-36         | 10                               | 0                    | 0                    | 66.7                                 | 11                                                  |
| A3         | AVFIHNFKRK       | 10  | Integrase 179-188 | 15                               | 0                    | 0                    | 0                                    | 0                                                   |
| A3         | AVDLSHFLK        | 9   | Nef 84-92         | 6                                | 50                   | 19.2                 | 69                                   | 9.4                                                 |
| A3         | ERILSTYLGR       | 10  | Rev 57-66         | 0.004                            | 0                    | 5.3                  | 84                                   | 17                                                  |
| A3         | KLVDFRELNK       | 10  | RT 73-82          | 180                              | 0                    | 8                    | 8                                    | 0.8                                                 |
| A3         | HMYISKKAK        | 9   | Vif 28-36         | 50                               | 5                    | 10                   | 76                                   | 13                                                  |
| A3302      | EYRKILRQR        | 9   | Vpu 29-37         | 45                               | 5                    | 20                   | 40                                   | 9                                                   |
| A68        | IVTRIVELL        | 9   | gp160 777-785     | 4                                | 23                   | 0                    | 73                                   | 14                                                  |
| A68        | ITLWQRPLV        | 9   | Protease 3-11     | 2                                | 0                    | 0                    | 23                                   | 2.6                                                 |
| A68        | DTVLEEWNL        | 9   | Protease 30-38    | 9                                | 0                    | 0                    | 54                                   | 9                                                   |

**Table 4**

| HLA allele | Peptide Sequence | Mer | Protein Region | BIMAS Estimated Binding Affinity | Variability Anchor 1 | Variability Anchor 2 | Percentage B Clade Strains Different | Percentage Residues Mutated Amongst B Clade strains |
|------------|------------------|-----|----------------|----------------------------------|----------------------|----------------------|--------------------------------------|-----------------------------------------------------|
| B14        | ERYLKDQQL        | 9   | gp160 584-592  | 300                              | 0                    | 9                    | 64                                   | 8                                                   |
| B14        | DRFYKTLRA        | 9   | p24 166-174    | 15                               | 0                    | 4.2                  | 8.3                                  | 0.9                                                 |
| B27        | GRRGWEALKY       | 10  | gp160 786-795  | 1000                             | 9.1                  | 0                    | 64                                   | 7.7                                                 |
| B27        | RRQDILDLWI       | 10  | Nef 105-114    | 1800                             | 3.8                  | 27                   | 62                                   | 9.2                                                 |
| B27        | IRLRPGGKK        | 9   | p17 19-27      | 2000                             | 0                    | 0                    | 8                                    | 1                                                   |
| B27        | KRWIILGLNK       | 10  | p24 131-140    | 30000                            | 0                    | 0                    | 4                                    | 4                                                   |
| B3501      | TAVPWNASW        | 9   | gp160 606-614  | 1.5                              | 41                   | 0                    | 59                                   | 9.1                                                 |
| B3501      | DPNPQEVVL        | 9   | gp160 78-86    | 20                               | 0                    | 5                    | 23                                   | 3                                                   |
| B3501      | NSSKVSQNY        | 9   | p17 124-132    | 10                               | 29                   | 0                    | 46                                   | 10.2                                                |
| B3501      | WASRELERF        | 9   | p17 36-44      | 4.5                              | 0                    | 0                    | 0                                    | 0                                                   |
| B3501      | PPIPVGDIY        | 9   | p24 122-130    | 4                                | 4.2                  | 0                    | 8.3                                  | 0.9                                                 |
| B3501      | TVLDVGDAY        | 9   | RT 107-115     | 4                                | 7.7                  | 0                    | 7.7                                  | 0.9                                                 |
| B3501      | VPLDEDFRKY       | 10  | RT 118-127     | 120                              | 0                    | 0                    | 31                                   | 4                                                   |
| B3501      | NPDIVIQY         | 9   | RT 175-183     | 12                               | 0                    | 0                    | 23                                   | 2.6                                                 |
| B3701      | YFPDWQNYT        | 9   | Nef 120-128    | 0.1                              | 3.8                  | 0                    | 19                                   | 3                                                   |
| B3901      | GHQAAMQML        | 9   | p24 61-69      | 135                              | 0                    | 0                    | 58                                   | 10                                                  |
| B5101      | LPCRIKQII        | 9   | gp160 416-424  | 692.12                           | 9                    | 23                   | 64                                   | 8                                                   |
| B5101      | RAIEAQQHL        | 9   | gp160 557-565  | 36.6                             | 0                    | 27                   | 36                                   | 4.5                                                 |
| B5101      | EKEGKISKI        | 9   | RT 42-50       | 1.9                              | 0                    | 7.7                  | 7.7                                  | 0.8                                                 |
| B5801      | TSTLQEIQGW       | 10  | p24 108-117    | 80                               | 0                    | 0                    | 4.2                                  | 0.4                                                 |
| B5801      | KAVRLIKFLY       | 10  | Rev 14-23      | 13.5                             | 11                   | 0                    | 47                                   | 6.8                                                 |
| B60        | QELKNSAVSL       | 10  | gp160 805-814  | 640                              | 0                    | 5                    | 41                                   | 4.5                                                 |
| B60        | KEKGGLEGL        | 9   | Nef 92-100     | 160                              | 7.7                  | 0                    | 27                                   | 4.3                                                 |
| B60        | IEIKDTKEAL       | 10  | p17 92-101     | 320                              | 29                   | 0                    | 63                                   | 7.8                                                 |
| B60        | SEGATPQDL        | 9   | p24 44-52      | 160                              | 0                    | 0                    | 12.5                                 | 1.4                                                 |
| B60        | KELYPLTSL        | 9   | p6 33-41       | 320                              | 21                   | 0                    | 42                                   | 6                                                   |
| B60        | IEELRQHLL        | 9   | RT 202-210     | 160                              | 0                    | 0                    | 23                                   | 2.6                                                 |
| B62        | GLNKIVRMY        | 9   | p24 137-145    | 80                               | 0                    | 0                    | 0                                    | 0                                                   |
| B62        | ILKEPVHGVY       | 10  | RT 309-318     | 377.5                            | 0                    | 0                    | 31                                   | 4                                                   |
| B7         | RPNNNTRKSI       | 10  | gp160 298-307  | 12                               | 14                   | 4.5                  | 77                                   | 15                                                  |
| B7         | IPRRIRQGL        | 9   | gp160 843-851  | 1200                             | 0                    | 14                   | 64                                   | 9                                                   |
| B7         | TPGPGVRYPL       | 10  | Nef 128-137    | 120                              | 3.8                  | 3.8                  | 46                                   | 8                                                   |
| B7         | FPVTPQVPLR       | 10  | Nef 68-77      | 0.2                              | 0                    | 0                    | 19                                   | 1.9                                                 |
| B7         | TPQVPLRPM        | 9   | Nef 71-79      | 30                               | 0                    | 3.8                  | 19                                   | 2.6                                                 |
| B7         | RPMTYKAAL        | 9   | Nef 77-85      | 240                              | 0                    | 50                   | 88                                   | 15                                                  |
| B7         | SPRTLNAWV        | 9   | p24 16-24      | 40                               | 0                    | 0                    | 4.2                                  | 0.5                                                 |
| B7         | GPGHKARVL        | 9   | p24 223-231    | 80                               | 0                    | 0                    | 33                                   | 5.5                                                 |
| B7         | TPQDLNTML        | 9   | p24 48-56      | 80                               | 3.8                  | 0                    | 4.2                                  | 0.5                                                 |
| B7         | HPVHAGPIA        | 9   | p24 84-92      | 2                                | 0                    | 8.3                  | 33                                   | 6                                                   |
| B7         | HPRVSSEVHI       | 10  | Vif 48-57      | 80                               | 0                    | 0                    | 48                                   | 7.1                                                 |
| B7         | FPRIWLHGL        | 9   | Vpr 34-42      | 800                              | 0                    | 0                    | 71                                   | 9.2                                                 |
| B8         | GGKKKYKLG        | 9   | p17 24-32      | 0.04                             | 0                    | 0                    | 63                                   | 8.3                                                 |
| B8         | ELRSLYNTV        | 9   | p17 74-82      | 2.4                              | 42                   | 0                    | 71                                   | 15.7                                                |
| B8         | DCKTTILKAL       | 9   | p24 197-205    | 32                               | 4.2                  | 0                    | 4.2                                  | 0.5                                                 |
| B8         | GPKVKQWPL        | 9   | RT 18-26       | 320                              | 0                    | 0                    | 0                                    | 0                                                   |
| B8         | RVKEKYQHL        | 9   | gp160 2-10     | 60                               | 36                   | 9.1                  | 77                                   | 24                                                  |
| Cw_0401    | SFNCGGEFF        | 9   | gp160 375-383  | 100                              | 0                    | 0                    | 18                                   | 2                                                   |

**Table 5**

| Epitopes that have less than 10% variability |                    |     |                   |                |                      |                      |                              |                             |  |
|----------------------------------------------|--------------------|-----|-------------------|----------------|----------------------|----------------------|------------------------------|-----------------------------|--|
| HLA allele                                   | Peptide Sequence   | Mer | Protein Region    | BIMAS Affinity | Variability Anchor 1 | Variability Anchor 2 | Percentage Strains Different | Percentage Residues Mutated |  |
| A1101                                        | AVFIHFKRKK         | 10  | Integrase 179-188 | 2              | 0                    | 0                    | 0                            | 0                           |  |
| A3                                           | AVFIHFKRKK         | 10  | Integrase 179-188 | 15             | 0                    | 0                    | 0                            | 0                           |  |
| B3501                                        | WASRELERF          | 9   | p17 36-44         | 4.5            | 0                    | 0                    | 0                            | 0                           |  |
| <b>B62</b>                                   | <b>GLNKIVRMY</b>   | 9   | p24 137-145       | 80             | 0                    | 0                    | 0                            | 0                           |  |
| <b>B8</b>                                    | <b>GPKVKQWPL</b>   | 9   | RT 18-26          | 320            | 0                    | 0                    | 0                            | 0                           |  |
| <b>B27</b>                                   | <b>KRWILGLNK</b>   | 10  | p24 131-140       | 30000          | 0                    | 0                    | 4                            | 4                           |  |
| <b>B5801</b>                                 | <b>TSTLQEQIGW</b>  | 10  | p24 108-117       | 80             | 0                    | 0                    | 4.2                          | 0.4                         |  |
| <b>B7</b>                                    | <b>SPRTLNAWV</b>   | 9   | p24 16-24         | 40             | 0                    | 0                    | 4.2                          | 0.5                         |  |
| <b>B7</b>                                    | <b>TPQDLNTML</b>   | 9   | p24 48-56         | 80             | 3.8                  | 0                    | 4.2                          | 0.5                         |  |
| B8                                           | DKKTILKAL          | 9   | p24 197-205       | 32             | 4.2                  | 0                    | 4.2                          | 0.5                         |  |
| A0301                                        | TVYYGVPVWK         | 10  | gp160 37-46       | 15             | 0                    | 4.5                  | 4.5                          | 0.5                         |  |
| A0301                                        | GIPHPAGLK          | 9   | RT 93-101         | 2.7            | 0                    | 0                    | 7.7                          | 0.8                         |  |
| B3501                                        | TVLDVGDAY          | 9   | RT 107-115        | 4              | 7.7                  | 0                    | 7.7                          | 0.9                         |  |
| B5101                                        | EKEGKISKI          | 9   | RT 42-50          | 1.9            | 0                    | 7.7                  | 7.7                          | 0.8                         |  |
| A0201                                        | LVGPTPVNI          | 9   | Protease 76-84    | 1.55           | 8                    | 0                    | 8                            | 0.9                         |  |
| <b>A3</b>                                    | <b>KLVDFFRELNK</b> | 10  | RT 73-82          | 180            | 0                    | 8                    | 8                            | 0.8                         |  |
| <b>B27</b>                                   | <b>IRLRPGGKK</b>   | 9   | p17 19-27         | 2000           | 0                    | 0                    | 8                            | 1                           |  |
| B14                                          | DRFYKTLRA          | 9   | p24 166-174       | 15             | 0                    | 4.2                  | 8.3                          | 0.9                         |  |
| B3501                                        | PPIPVGDIY          | 9   | p24 122-130       | 4              | 4.2                  | 0                    | 8.3                          | 0.9                         |  |
